# Supplementary material for: Engineering selective CO2 photoreduction by tailored interfacial design of P-modulated CuPc/B-C3N4 heterojunction for improved C2H4 selectivity
Source: Royal Society of Chemistry journal article supplement (doi:10.1039/d3cy01447a), 2023-01-01
Supplement: d3cy01447a1.pdf [file d3cy01447a1.pdf]

## Supporting Information

### Engineering selective CO<sub>2</sub> photoreduction by tailored interfacial design of P-modulated CuPc/B-C<sub>3</sub>N<sub>4</sub> heterojunction for improved C<sub>2</sub>H<sub>4</sub> selectivity

Imran Khan<sup>a\*</sup>, Baoji Miao<sup>a\*</sup>, Salman Khan<sup>b</sup>, Amir Zada<sup>c</sup>, Sharafat Ali<sup>d</sup>, Muhammad Rizwan<sup>e</sup>, Afsar Khan<sup>f</sup>, Abdullah N. Alodhayb<sup>g</sup>, Muhammad Ishaq Ali Shah<sup>c</sup>,

<sup>a</sup> Henan International Joint Laboratory of Nano-Photoelectric Magnetic Materials, School of Materials Science and Engineering, Henan University of Technology, Zhengzhou city, 450001, PR China.

<sup>b</sup> Key Laboratory of Functional Inorganic Materials Chemistry (Heilongjiang University), Ministry of Education, School of Chemistry and Materials Science, International Joint Research Center and Lab for Catalytic Technology, Harbin 150080, PR China.

<sup>c</sup> Department of Chemistry, Abdul Wali Khan University, Mardan, Khyber Pakhtunkhwa, 23200, Pakistan

<sup>d</sup> School of Physics, University of Electronic Science and Technology of China, Chengdu 610054, PR China.

<sup>e</sup> School of Energy Science and Engineering, Central South University, Changsha, 410083, PR China.

<sup>f</sup> School of Mineral Processing and Bioengineering, Central South University, 410083, Changsha, PR China

<sup>g</sup> Department of Physics and Astronomy, College of Science, King Saud University, Riyadh

**Corresponding authors:** Imran Khan ([imrankhan@csu.edu.cn](mailto:imrankhan@csu.edu.cn)), and Baoji Miao ([miaobaoji@foxmail.com](mailto:miaobaoji@foxmail.com))

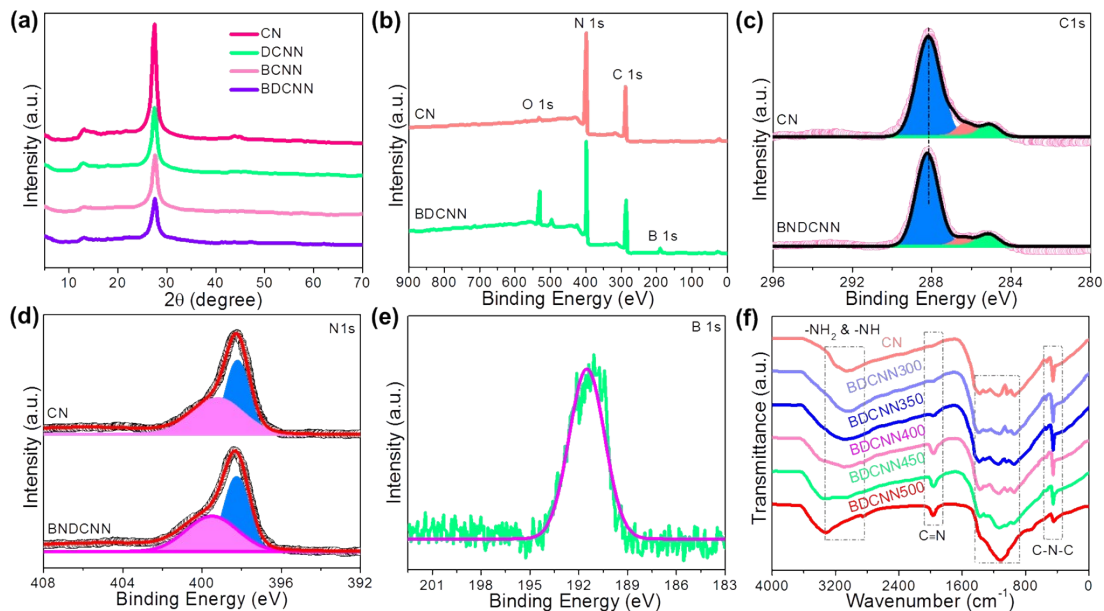

**Figure 1.** (a) XRD pattern spectra of prepared CN, DCNN, BCNN and BDCNN catalysts. (b) The survey XPS spectra of CN and BDCNN<sub>x</sub>, The corresponding high-resolution XPS spectra of (c) C 1s, (d) N 1s and (e) B 1s; (f) FTIR spectra of CN, and BDCNN<sub>x</sub> (x = 300, 350, 400, 450, 500).

The crystalline structures of the prepared materials were evaluated using XRD characterization. **Fig. S1a** illustrates that all the prepared catalysts exhibit two

characteristic diffraction peaks. The small peak at  $13.9^\circ$  corresponds to intralayer long-range atomic order (100), which is linked to the hydrogen bond in carbon nitride.<sup>[4]</sup> Additionally, the peak at  $27.2^\circ$  is attributed to interlayer periodic stacking (002) along the c-axis in carbon nitride.<sup>[5]</sup> The BDCNN<sub>x</sub> catalyst exhibits a decrease in the intensity of the (100) peak compared to the pristine CN catalyst, indicating partial disruption of hydrogen bonds in the framework. This weakened hydrogen bond effect leads to disordered periodic stacking of carbon nitride, resulting in a reduced (002) peak. An element analysis (EA) was conducted to investigate the elemental composition of BDCNN<sub>x</sub>. The results in Table S1 show that the catalyst contains 46.26% C, 47.25% N, and 1.851% H. Moreover, the molar ratio of C/N (0.98) is higher than the theoretical value of 0.75, implying the presence of surface N vacancies.

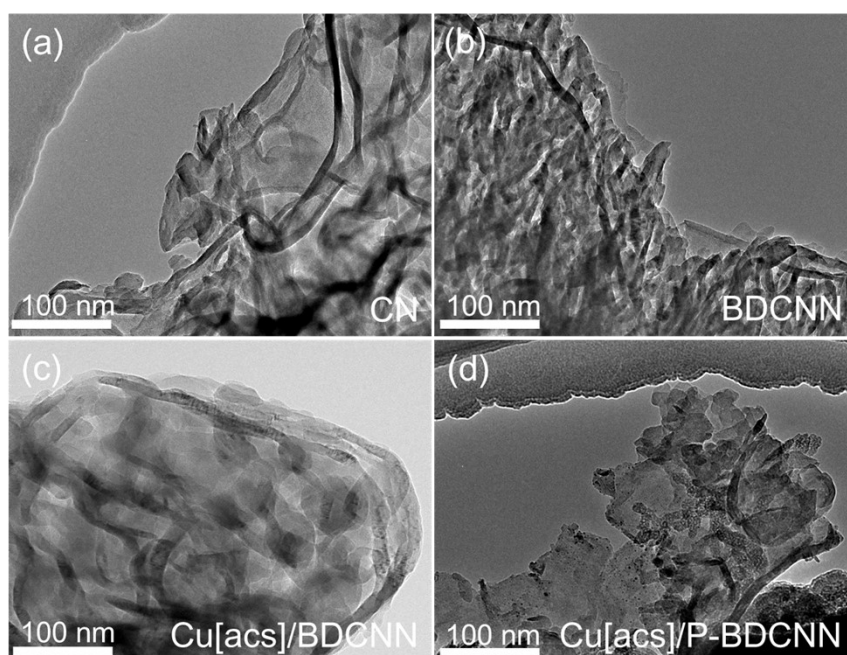

**Figure S2.** TEM images of (a) CN, (b) BDCNN, (c) Cu[acs]/BDCNN, (d) Cu[acs]/P-BDCNN.

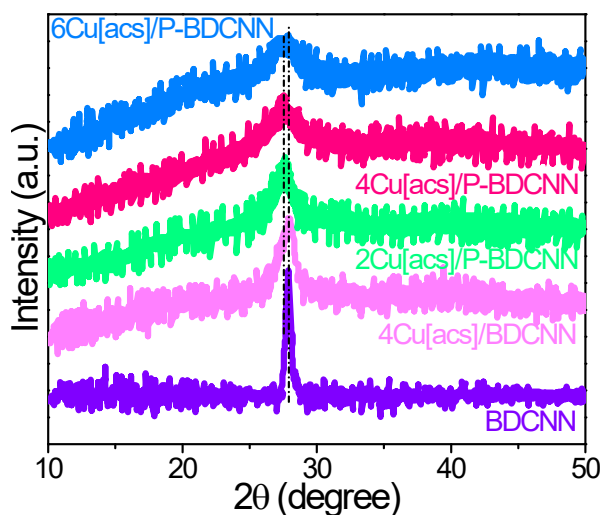

**Figure S3.** XRD patterns of BDCNN, 4Cu[acs]/BDCNN, 2Cu[acs]/P-BDCNN, 4Cu[acs]/P-BDCNN and 6Cu[acs]/P-BDCNN.

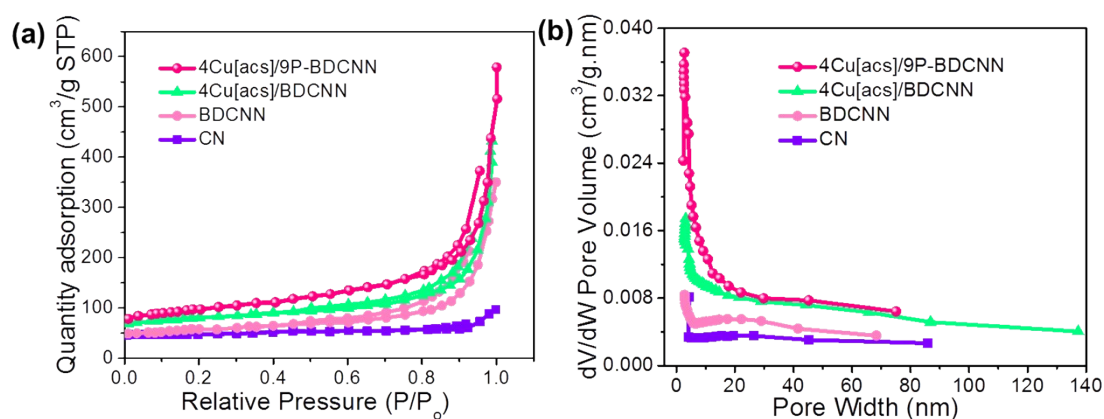

**Figure S4.** (a)  $N_2$  adsorption-desorption isotherms and (b) pore size distribution for prepared CN, BDCNN, 4Cu[acs]/BDCNN and 4Cu[acs]/9P-BDCNN catalysts.

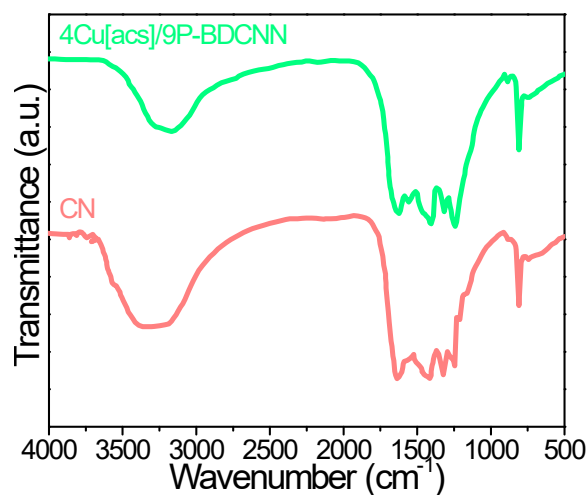

**Figure S5.** FTIR spectra of CN and 4Cu[acs]/9P-BDCNN.

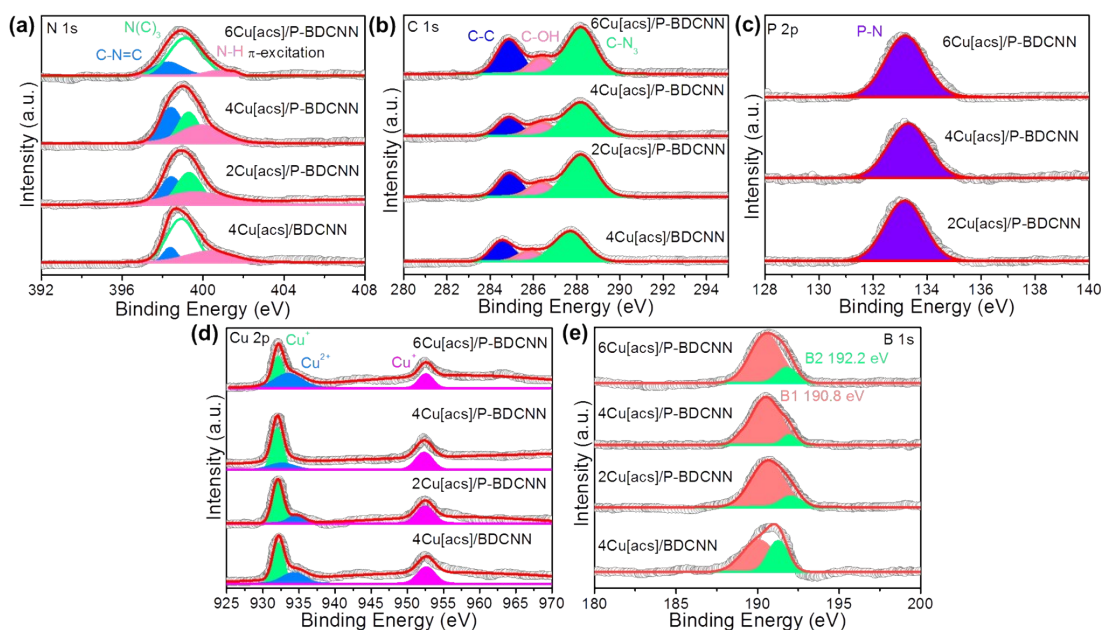

**Figure S6.** (a) The N 1s XPS spectra, (b) C 1s XPS spectra, (c) P 2p XPS spectra and (d) Cu 2p XPS spectra and (e) B 1s XPS spectra of the synthesized photocatalysts.

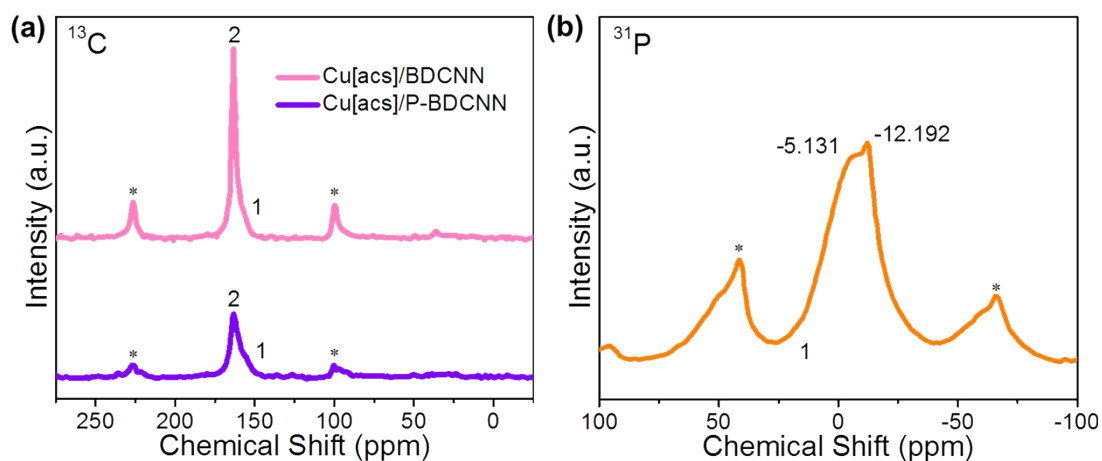

**Figure S7.** (a) Solid <sup>13</sup>C NMR spectra of Cu[acs]/BDCNN and Cu[acs]/P-BDCNN, (b) Solid <sup>31</sup>P NMR spectrum of Cu[acs]/P-BDCNN. Asterisk (\*) indicates the spinning side bands.

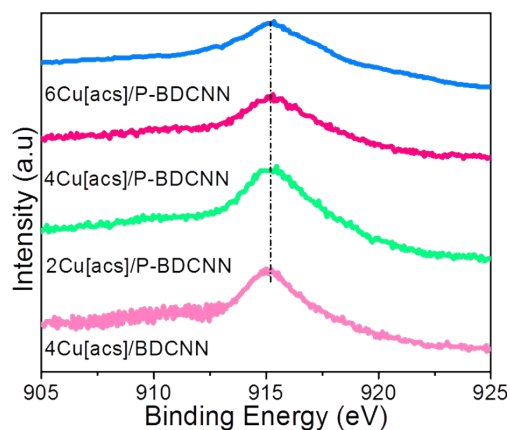

**Figure S8.** Cu LMM Auger spectra of 4[acs]/BDCNN, 2Cu[acs]/9P-BDCNN, 4Cu[acs]/9P-BDCNN, and 6Cu[acs]/9P-6BDCNN

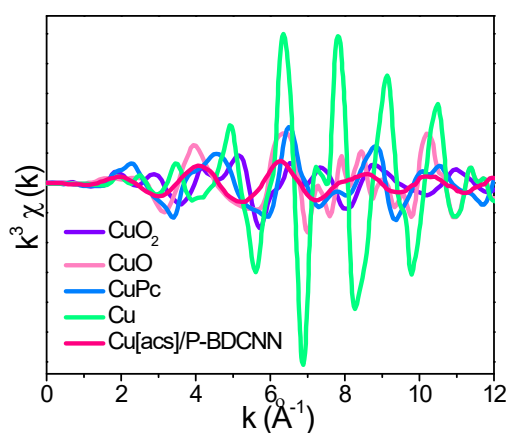

**Figure S9.** Extended X-ray absorption fine structure (EXAFS,  $k^3$ -weighted  $k$ -space) of 6Cu[acs]/9P-BDCNN

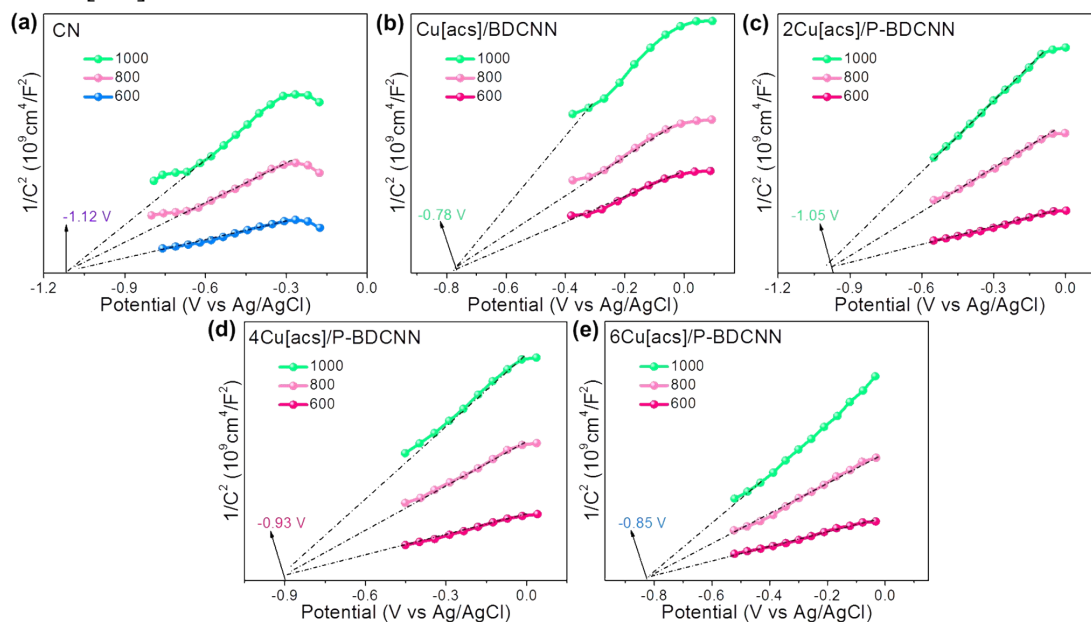

**Figure S10.** The Mott-Schottky plots of (a) CN, (b) Cu[acs]/BDCNN, (c) 2Cu[acs]/9P-BDCNN, (d) 4Cu[acs]/9P-BDCNN and (e) 6Cu[acs]/9P-BDCNN

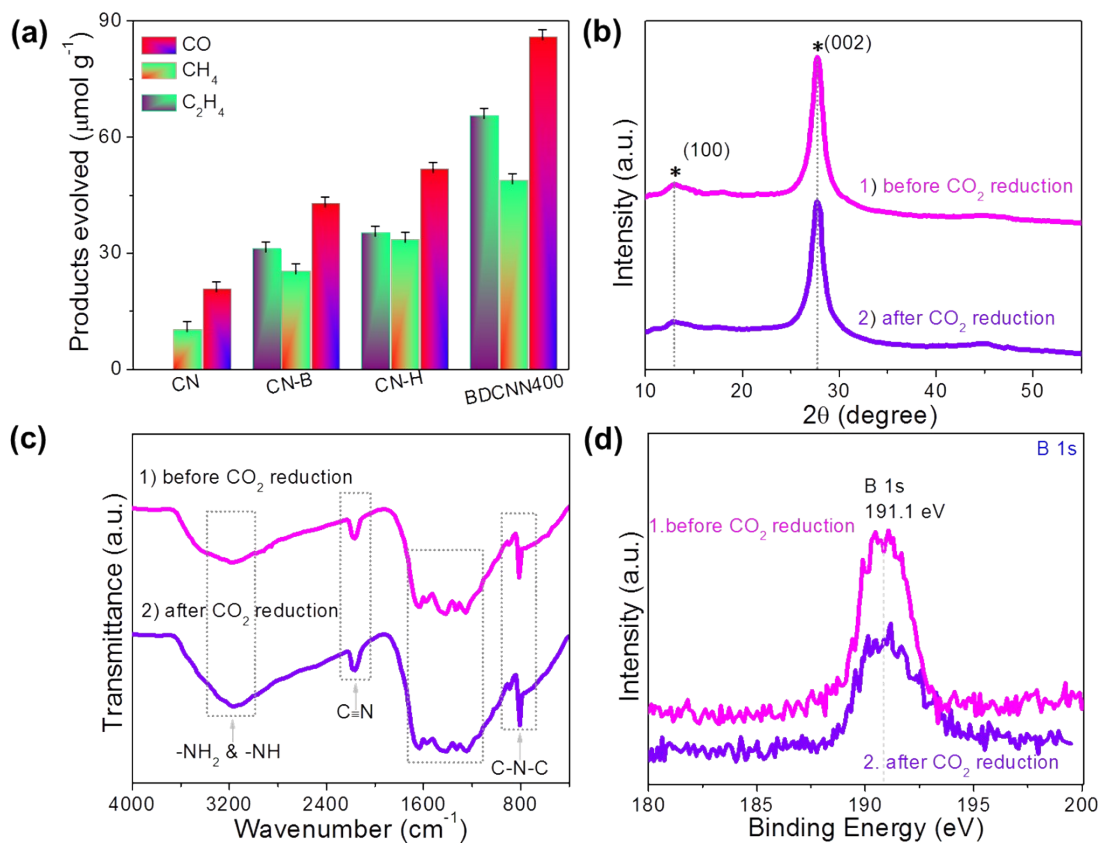

**Figure S11.** (a) Photocatalytic performance b) XRD diffractograms, c) FTIR spectra and d) high-resolution B1s XPS spectra of BDCNN400 1) before and 2) after the CO<sub>2</sub> reduction reaction.

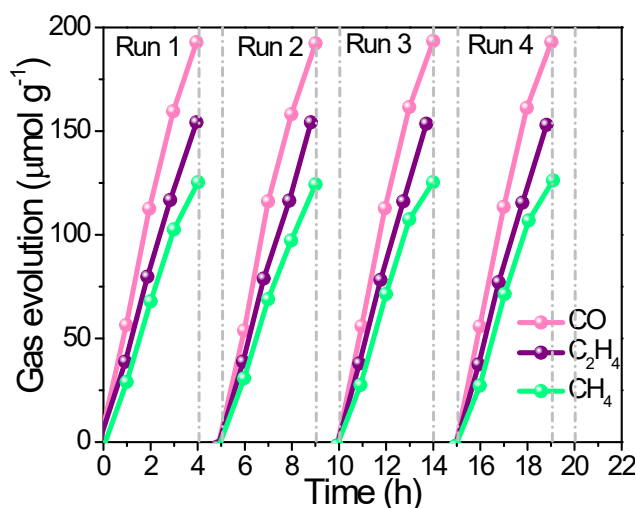

**Figure S12.** Reusability test of 4Cu[acs]/9P-BDCNN four consecutive runs of CO<sub>2</sub> reduction under visible-light irradiation

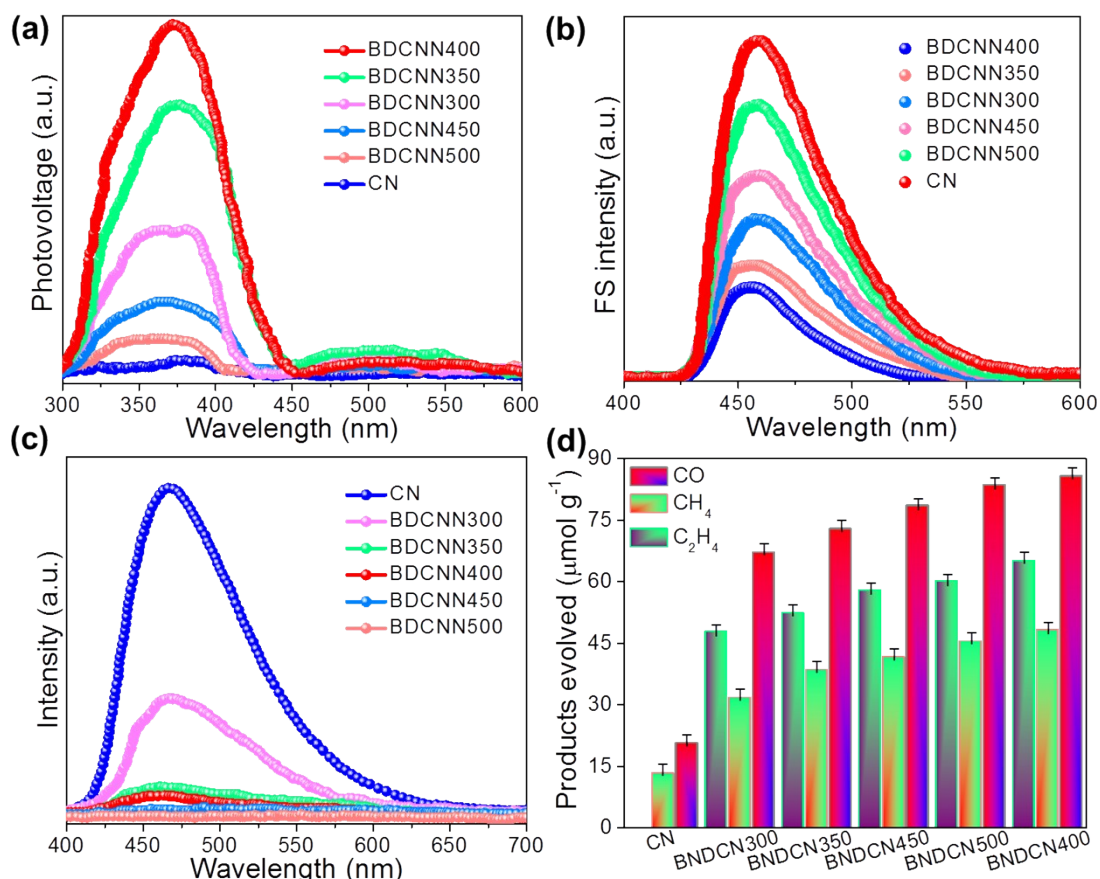

**Figure S13.** (a) SPS spectra, (b) fluorescence spectra related to the formed hydroxyl radicals under visible-light irradiation of BDCNN and XCoPc/BDCNN. (c) PL spectra and (d) Photocatalytic activities for CO<sub>2</sub> reduction reaction of CN and BDCNN<sub>x</sub> (x = 300, 350, 400, 450, 500) under visible-light irradiation.

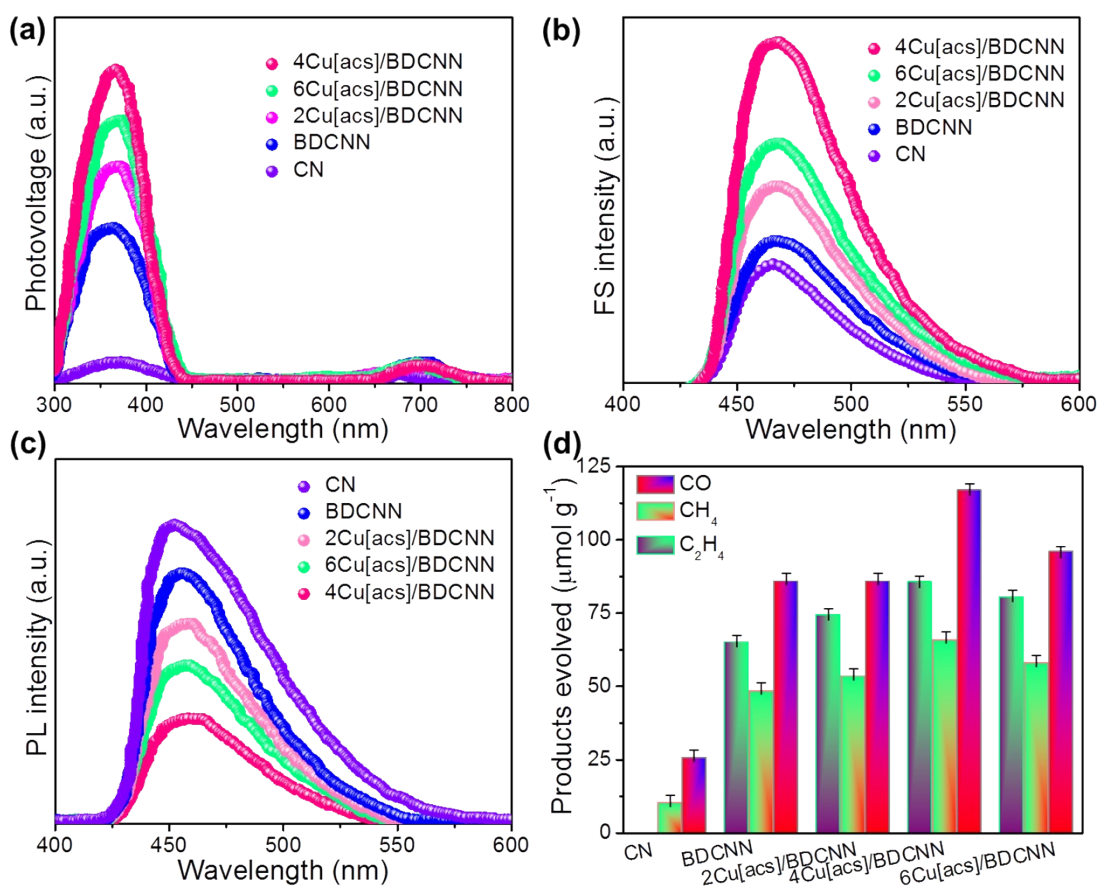

**Figure S14.** (a) SPS spectra (b) fluorescence spectra related to the formed hydroxyl radicals under visible-light irradiation (c) PL spectra and (d) Photocatalytic activities for CO<sub>2</sub> reduction reaction of CN, BDCNN and xCu[acs]/BDCNN (x = 2, 4, and 6) under visible-light irradiation.



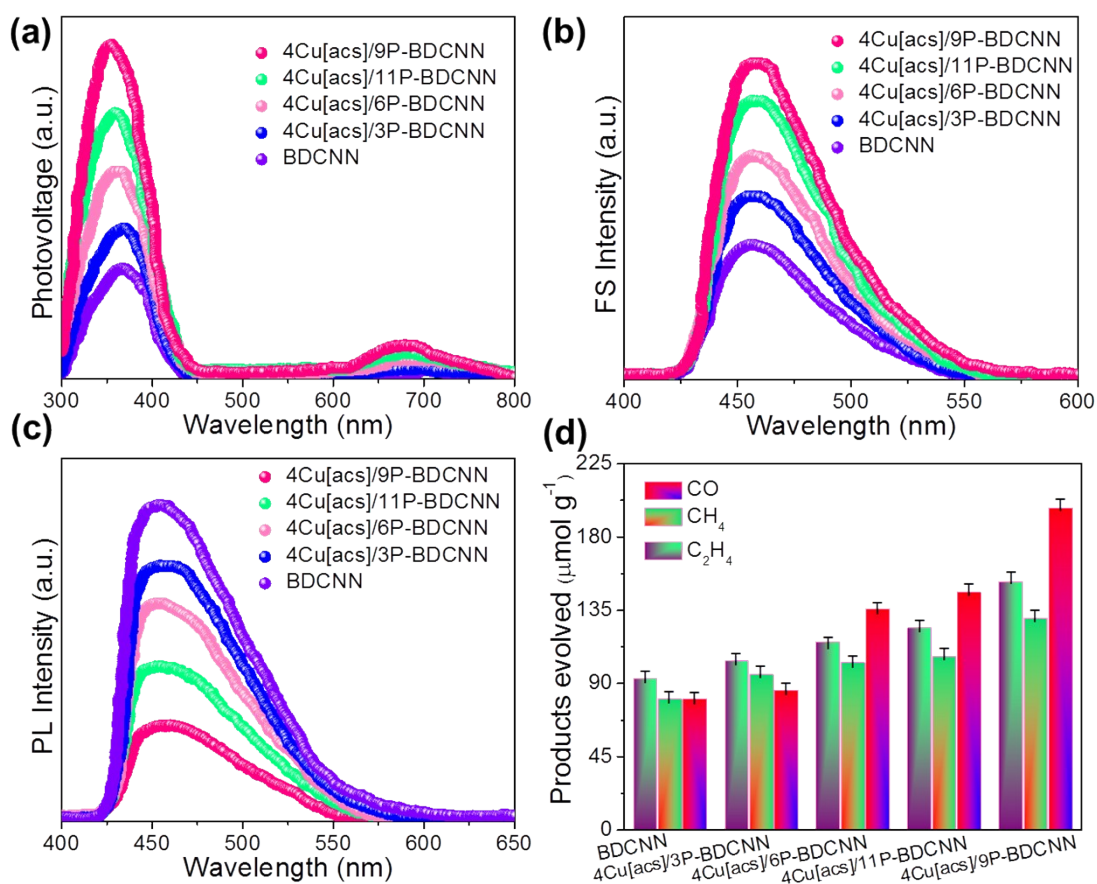

**Figure S15.** (a) SPS spectra (b) fluorescence spectra related to the formed hydroxyl radicals under visible-light irradiation (c) PL spectra and (d) Photocatalytic activities for CO<sub>2</sub> reduction reaction of CN, BDCNN and 4Cu[acs]/yP-BDCNN (y = 3, 6, 9 and 11) under visible-light irradiation.

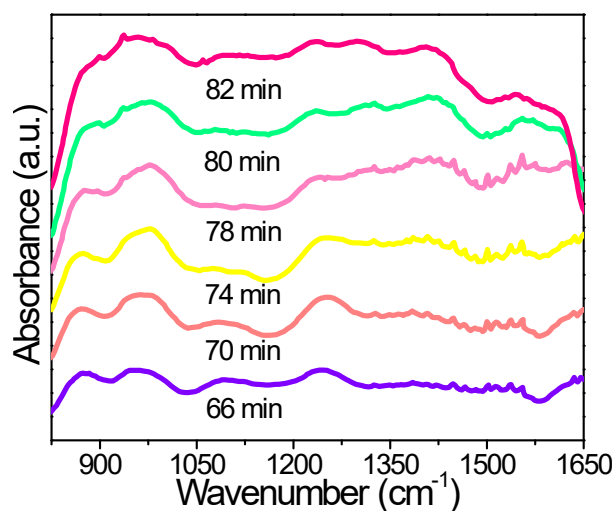

**Figure S16.** *In situ* DRIFTS spectra for detecting the reaction intermediates on 4Cu[acs]/9P-BDCNN in CO<sub>2</sub> photoreduction under 66~82 min simulated sunlight.

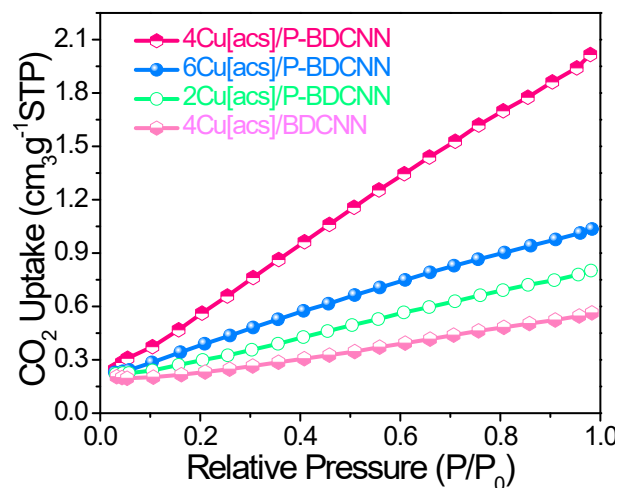

**Figure S17.** CO<sub>2</sub> adsorption isotherms for 4Cu[acs]/BDCNN, 2Cu[acs]/9P-BDCNN, 4Cu[acs]/9P-BDCNN and 4Cu[acs]/9P-BDCNN.

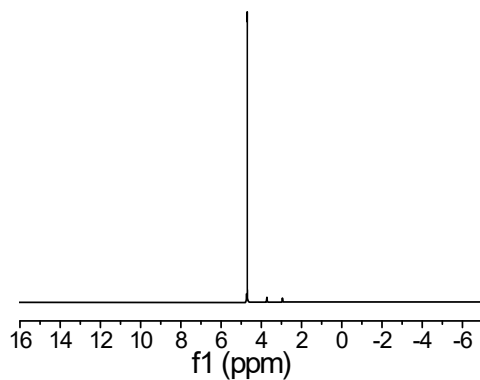

**Figure S18.** NMR spectrum of liquid products after 3 h CO<sub>2</sub> photoreduction over 4Cu[acs]/9P-BDCNN.

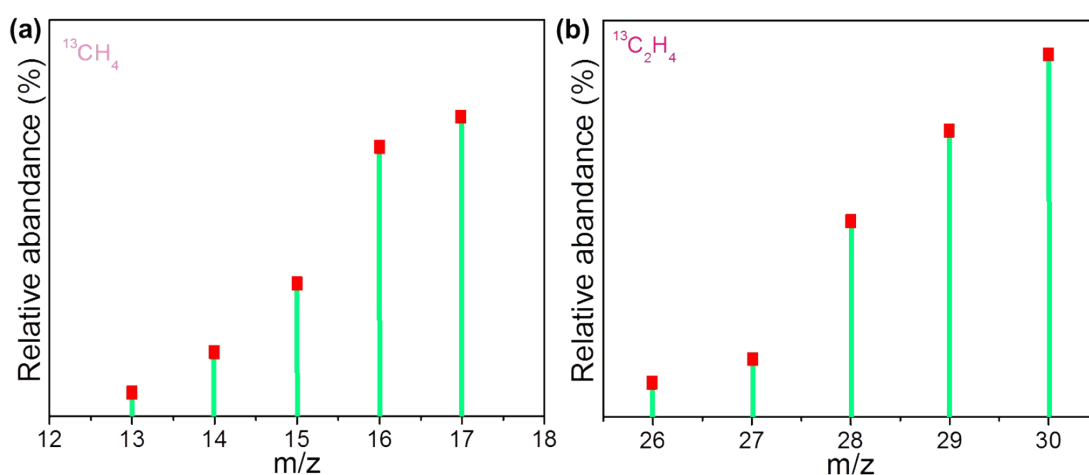

**Figure S19.** Mass spectra of <sup>13</sup>CH<sub>4</sub> (a) and <sup>13</sup>C<sub>2</sub>H<sub>4</sub> (b) production over 4Cu[acs]/9P-BDCNN.

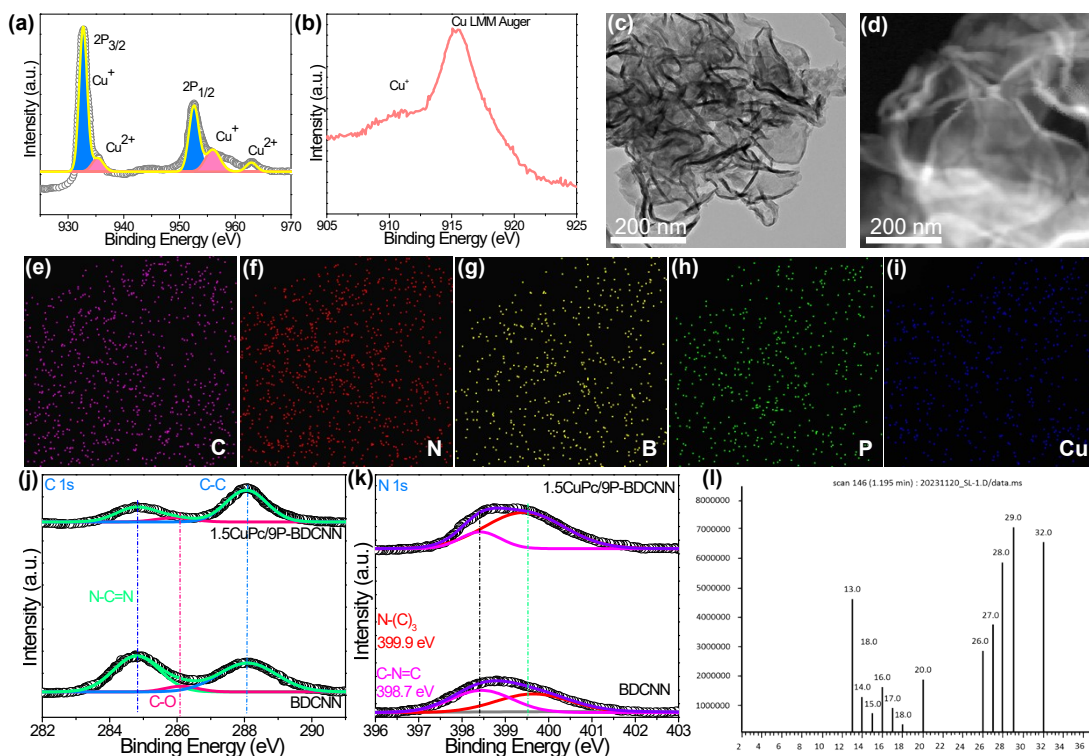

**Figure S20.** (a) Cu 2p XPS spectra, (b) Cu LMM Auger spectra, (c) TEM image and (d) HAADF-STEM image of 4Cu[acs]/9P-BDCNN and (e-i) EDS images of 4Cu[acs]/9P-BDCNN after four cycling tests. The corresponding high-resolution XPS spectra of (j) C 1s, (k) N 1s of BDCNN and 1.5CuPc/9P-BDCNN and (l) The online mass spectra of  $^{13}\text{CH}_4$ ,  $^{12}\text{CH}_4$ ,  $^{13}\text{C}_2\text{H}_4$  and  $^{13}\text{C}_2\text{H}_4$  of 1.5CuPc/9P-BDCNN.

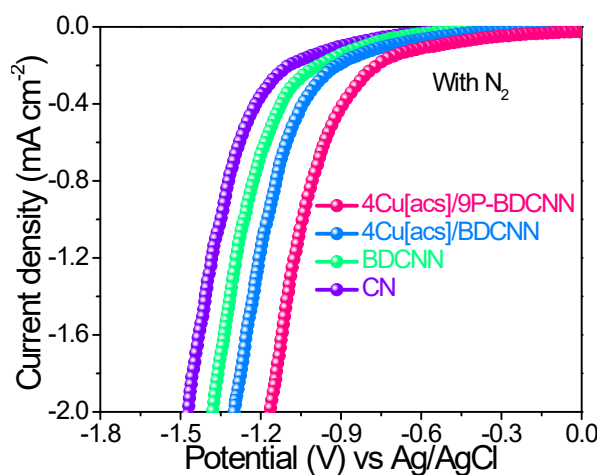

**Figure. S21** Electrochemical reduction curves of CN, BDCNN, 4Cu[acs]/BDCNN, and 4Cu[acs]/9P-BDCNN, respectively, with  $\text{CO}_2$  and  $\text{N}_2$ , bubbling system.

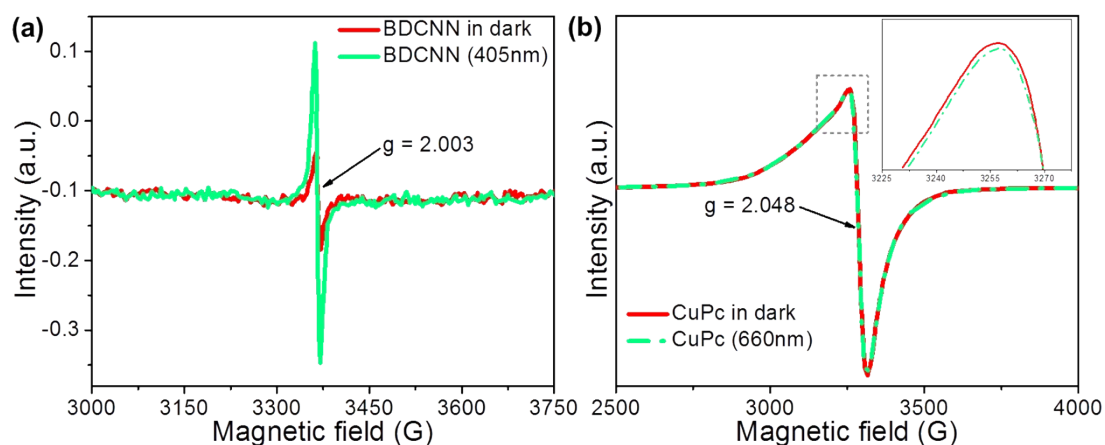

**Figure. S22** EPR spectra of (a) BDCNN with 405 nm monochromatic light irradiation, (b) CuPc with 660 nm monochromatic light irradiation.

**Table S1.** C, N, B, P and Cu contents (mol%) in g-C<sub>3</sub>N<sub>4</sub>, BDCNN and 1.5CuPc/9P-BDCNN according to elemental ICP analysis before and after CO<sub>2</sub> reduction reaction.

| Samples                         | Before reduction reaction |       |       |      |      | After reduction reaction |       |       |      |       |
|---------------------------------|---------------------------|-------|-------|------|------|--------------------------|-------|-------|------|-------|
|                                 | N                         | C     | B     | Cu   | P    | N                        | C     | B     | Cu   | P     |
| g-C <sub>3</sub> N <sub>4</sub> | 57.51                     | 38.31 | 0     | 0    | 0    | 56.20                    | 39.01 | 0     | 0    | 0     |
| BDCNN300                        | 54.78                     | 38.01 | 00.03 | 0    | 0    | 53.62                    | 37.21 | 0.015 | 0    | 0     |
| BDCNN350                        | 56.32                     | 38.43 | 01.38 | 0    | 0    | 54.31                    | 36.23 | 01.23 | 0    | 0     |
| BDCNN400                        | 52.65                     | 36.06 | 03.90 | 0    | 0    | 49.13                    | 35.12 | 03.72 | 0    | 0     |
| BDCNN450                        | 44.12                     | 35.55 | 16.21 | 0    | 0    | 45.01                    | 32.56 | 13.19 | 0    | 0     |
| BDCNN500                        | 38.75                     | 31.76 | 10.16 | 0    | 0    | 35.62                    | 31.03 | 10.61 | 0    | 0     |
| 4Cu[acs]/9P-BDCNN               | 43.16                     | 37.02 | 03.79 | 0.18 | 0.03 | 44.01                    | 36.03 | 03.45 | 0.17 | 0.014 |

**Table S2.** Binding energy of BDCNN, Cu[acs]/BDCNN and Cu[acs]/P-BDCNN with CH<sub>2</sub>.

| Material            | BDCNN | Cu[acs]/BDCNN | Cu[acs]/P-BDCNN |
|---------------------|-------|---------------|-----------------|
| E <sub>b</sub> (eV) | -4.85 | -5.24         | -5.75           |

## References

1. S. Grimme, *J Comput Chem.* 2006, 27, 1787-1799.
2. J. K. Norskov, J. Rossmeisl, A. Logadottir, L. Lindqvist, J. R. Kitchin, T. Bligaard, H. Jonsson, *J. Phys. Chem. B.* 2004, 108, 17886-17892.
3. J. P. Perdew, K. Burke, M. Ernzerhof, *Phys. Rev. Lett.* 1996, 77, 3865-3868.
4. C. Liang, H.P. Feng, H.Y. Niu, C.G. Niu, J.S. Li, D.W. Huang, L. Zhang, H. Guo, N. Tang, H.Y. Liu, 384 (2020) 123236.
5. C. Liang, C.G. Niu, H. Guo, D.W. Huang, X.J. Wen, S.F. Yang, G.M. Zeng, *Catal. Sci. Technol.* 8 (2018) 1161–1175
